# Supplementary material for: pH-Responsive metal–organic framework encapsulated gold nanoclusters with modulated release to enhance photodynamic therapy/chemotherapy in breast cancer
Source: Royal Society of Chemistry journal article supplement (doi:10.1039/c9tb02621e), 2020-01-01
Supplement: c9tb02621e1.pdf [file c9tb02621e1.pdf]

## Supporting Information

### **pH-Responsive Metal-Organic Framework Encapsulated Gold Nanoclusters with Modulation Release to Enhance Photodynamic Therapy/Chemotherapy in Breast Cancer**

Luyun Zhang<sup>1,2</sup>, Yang Gao<sup>1,2</sup>, Sijia Sun<sup>1,2</sup>, Zihou Li<sup>2</sup>, Aiguo Wu<sup>2\*</sup>, Leyong Zeng<sup>1\*</sup>

*<sup>1</sup>Key Laboratory of Medicinal Chemistry and Molecular Diagnosis of the Ministry of Education, Chemical Biology Key Laboratory of Hebei Province, College of Chemistry & Environmental Science, Hebei University, Baoding 071002, P.R. China.*

*<sup>2</sup>Cixi Institute of Biomedical Engineering, CAS Key Laboratory of Magnetic Materials and Devices, & Key Laboratory of Additive Manufacturing Materials of Zhejiang Province, Ningbo Institute of Materials Technology and Engineering, Chinese Academy of Sciences, Ningbo, 315201, P.R. China.*

*E-mail: zengly@hbu.cn (L. Zeng), aiguo@nimte.ac.cn (A. Wu)*

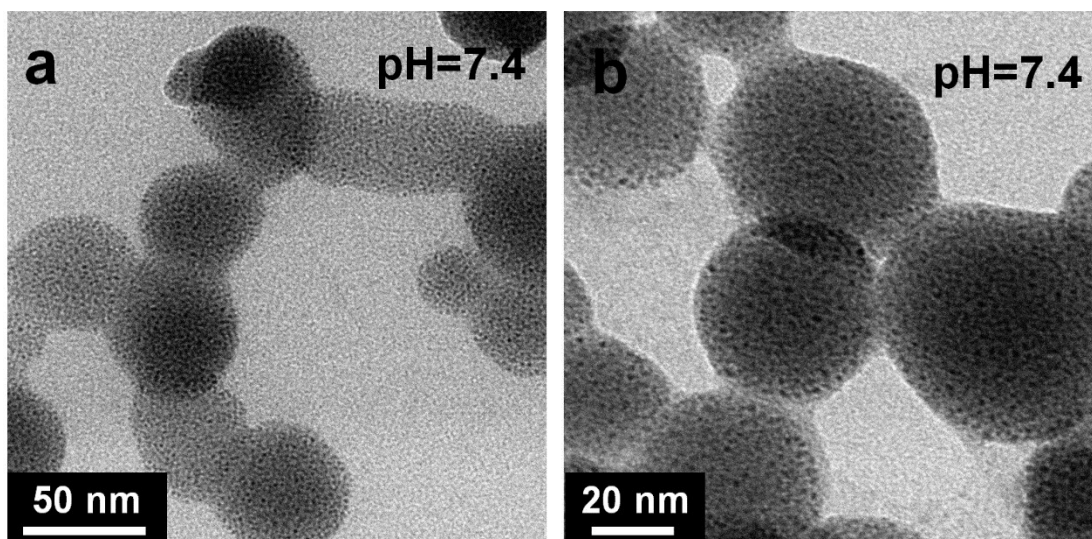

**Figure S1.** Low- and high-magnification TEM images of AuNCs@MOF-DOX in PBS buffer (pH=7.4).

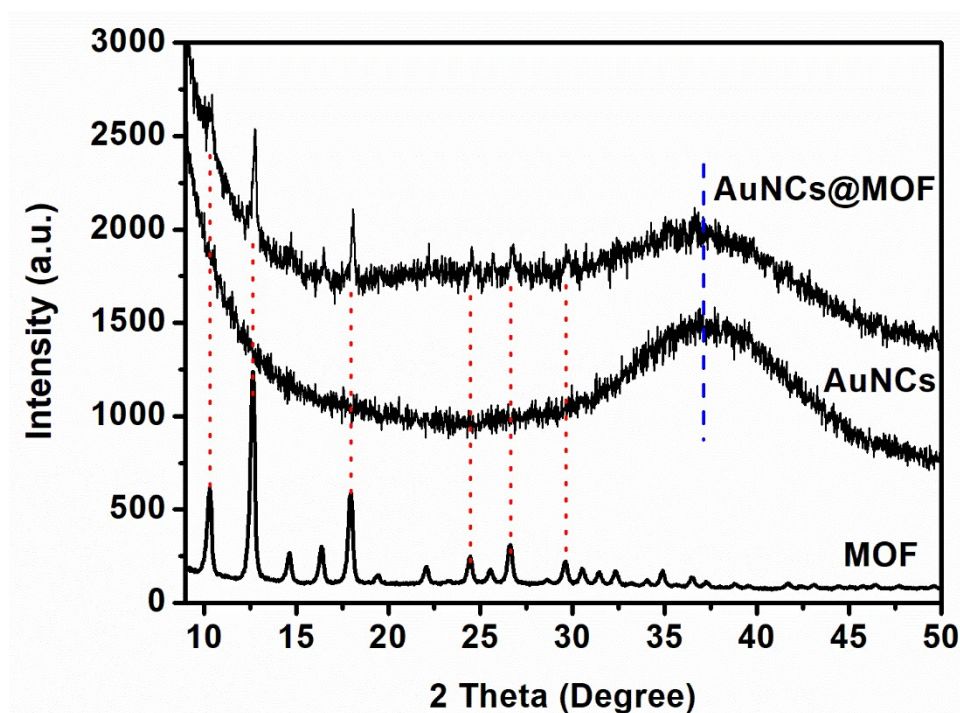

**Figure S2.** XRD patterns of MOF, AuNCs, and AuNCs@MOF.

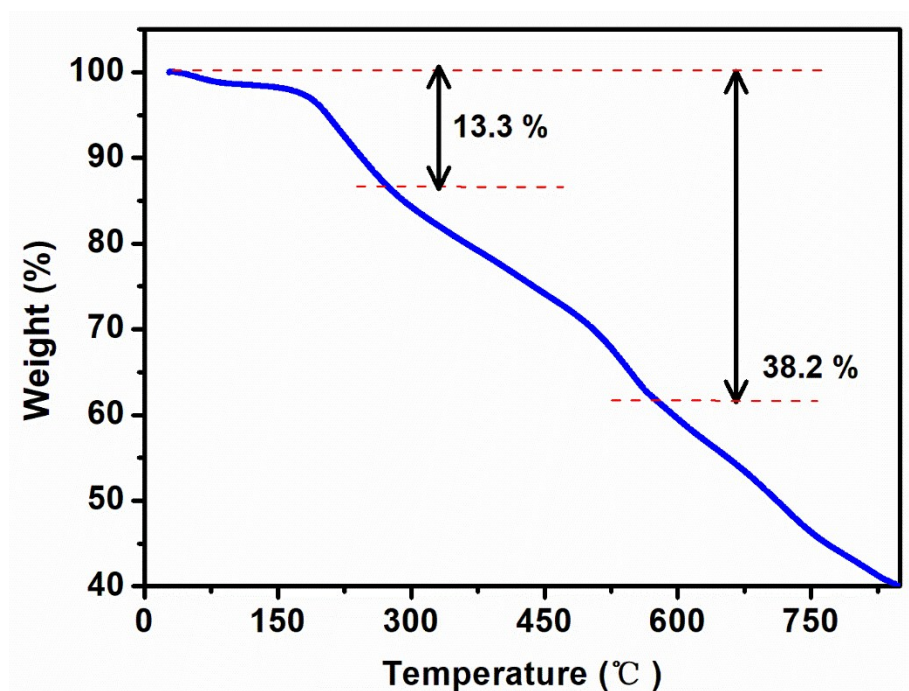

**Figure S3.** TGA curve of AuNCs@MOF-DOX under nitrogen flow.

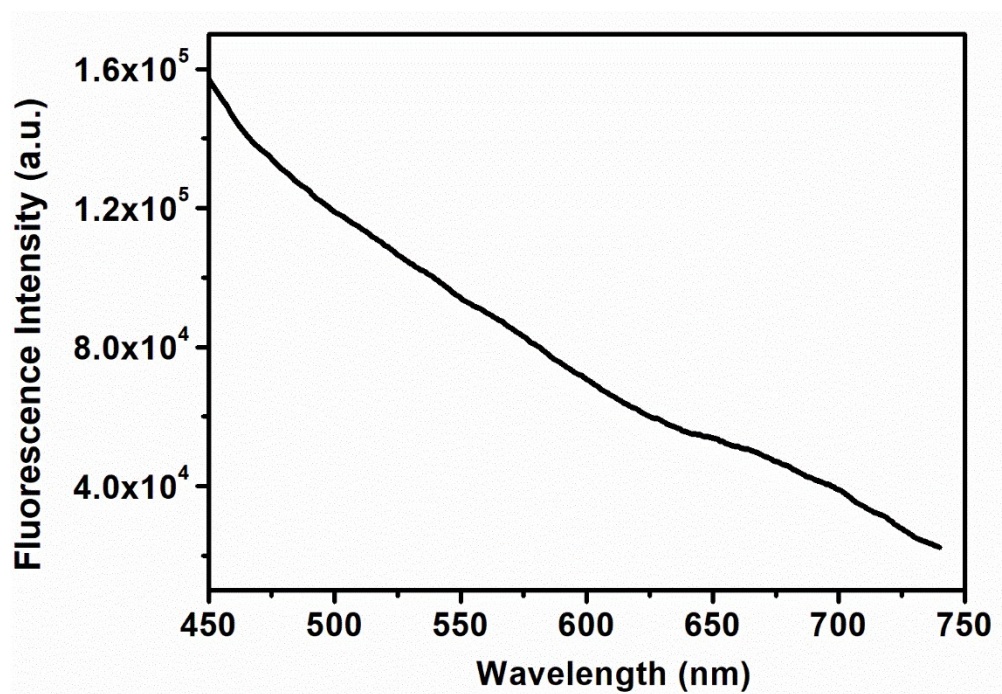

**Figure S4.** Excitation spectrum of AuNCs.

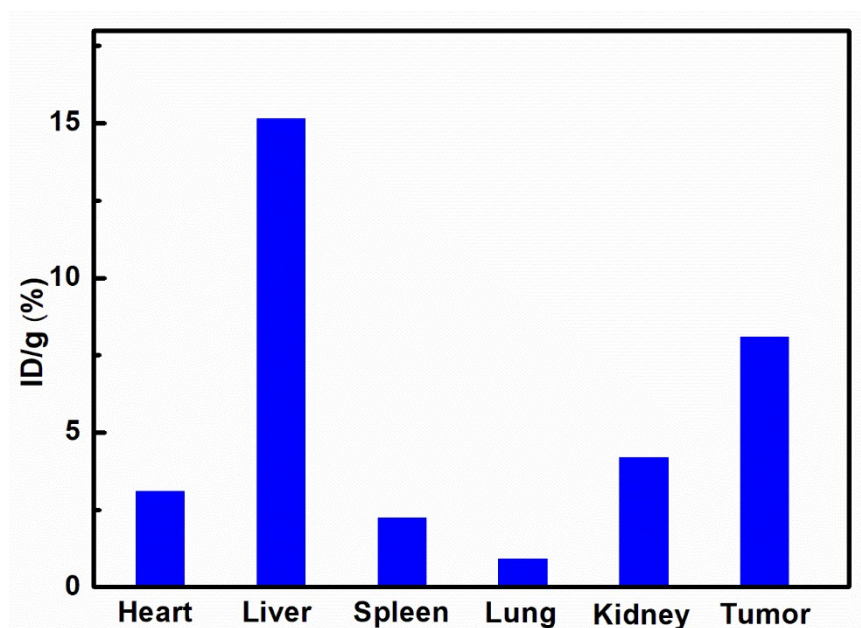

**Figure S5.** *In vivo* distribution of AuNCs@MOF-DOX in major organs and tumor by measuring Au element concentration.
